# Supplementary material
Source: PubMed Central journal article supplement (PMC2917233)

# **Total Synthesis of Neopeltolide and Analogs**

Yubo Cui, Wangyang Tu, and Paul E. Floreancig\*

Department of Chemistry, University of Pittsburgh, Pittsburgh, Pennsylvania  
15260, USA

$^1\text{H}$  and  $^{13}\text{C}$  NMR Spectra

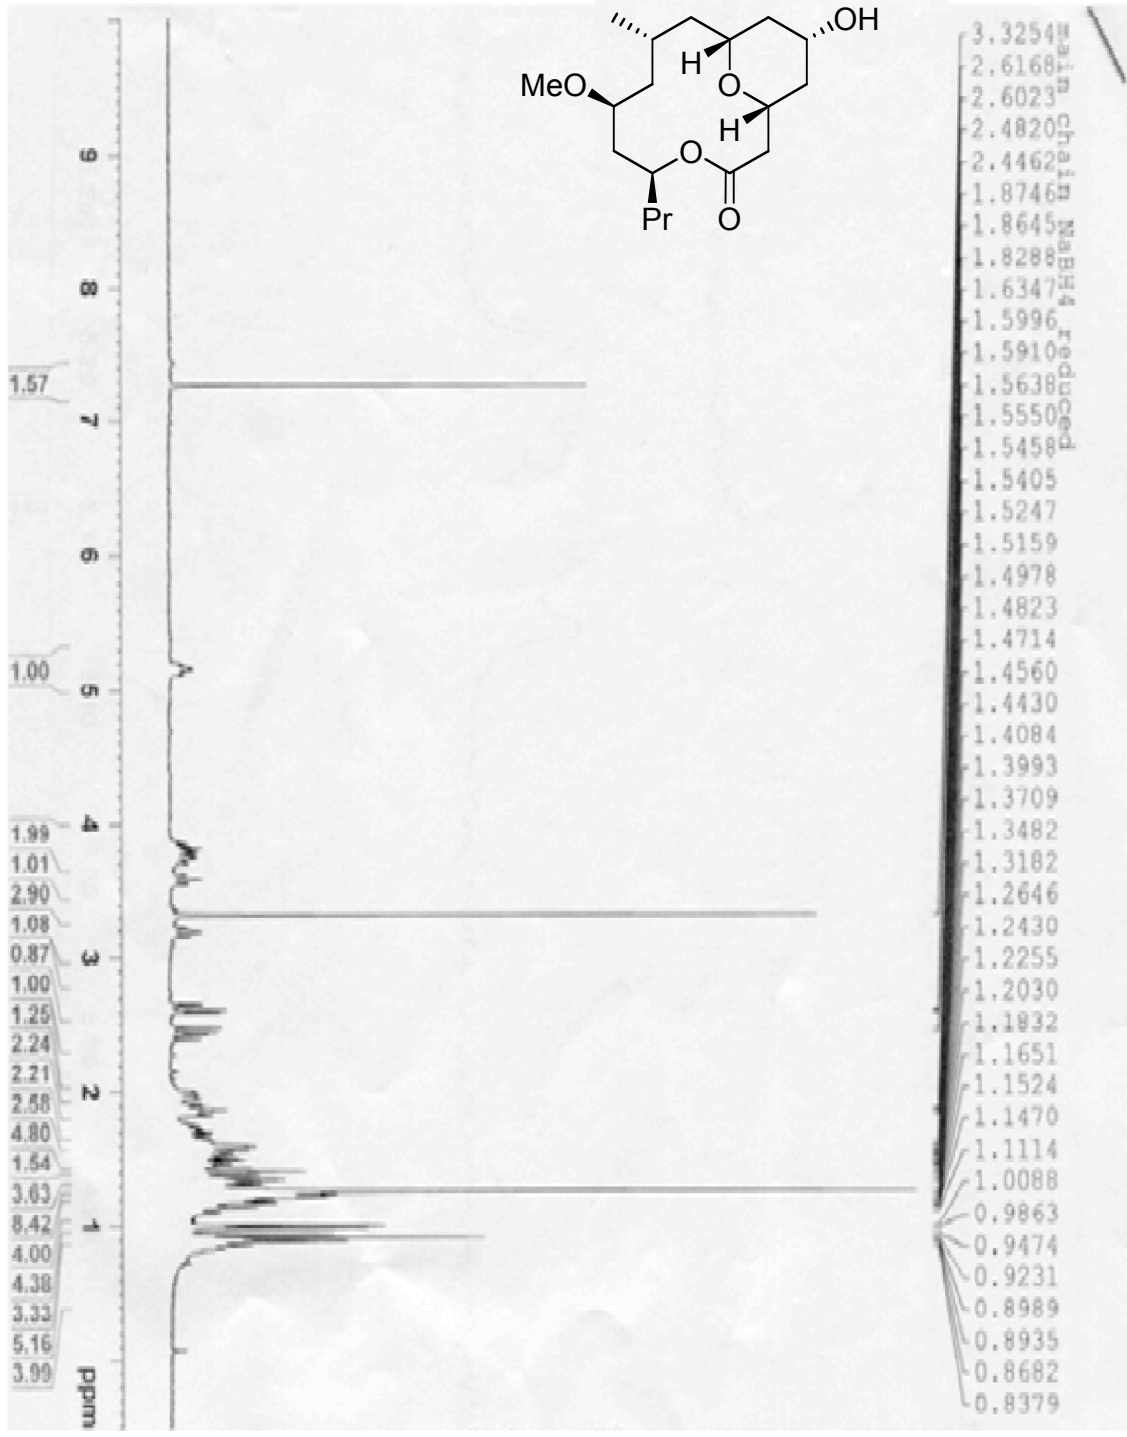

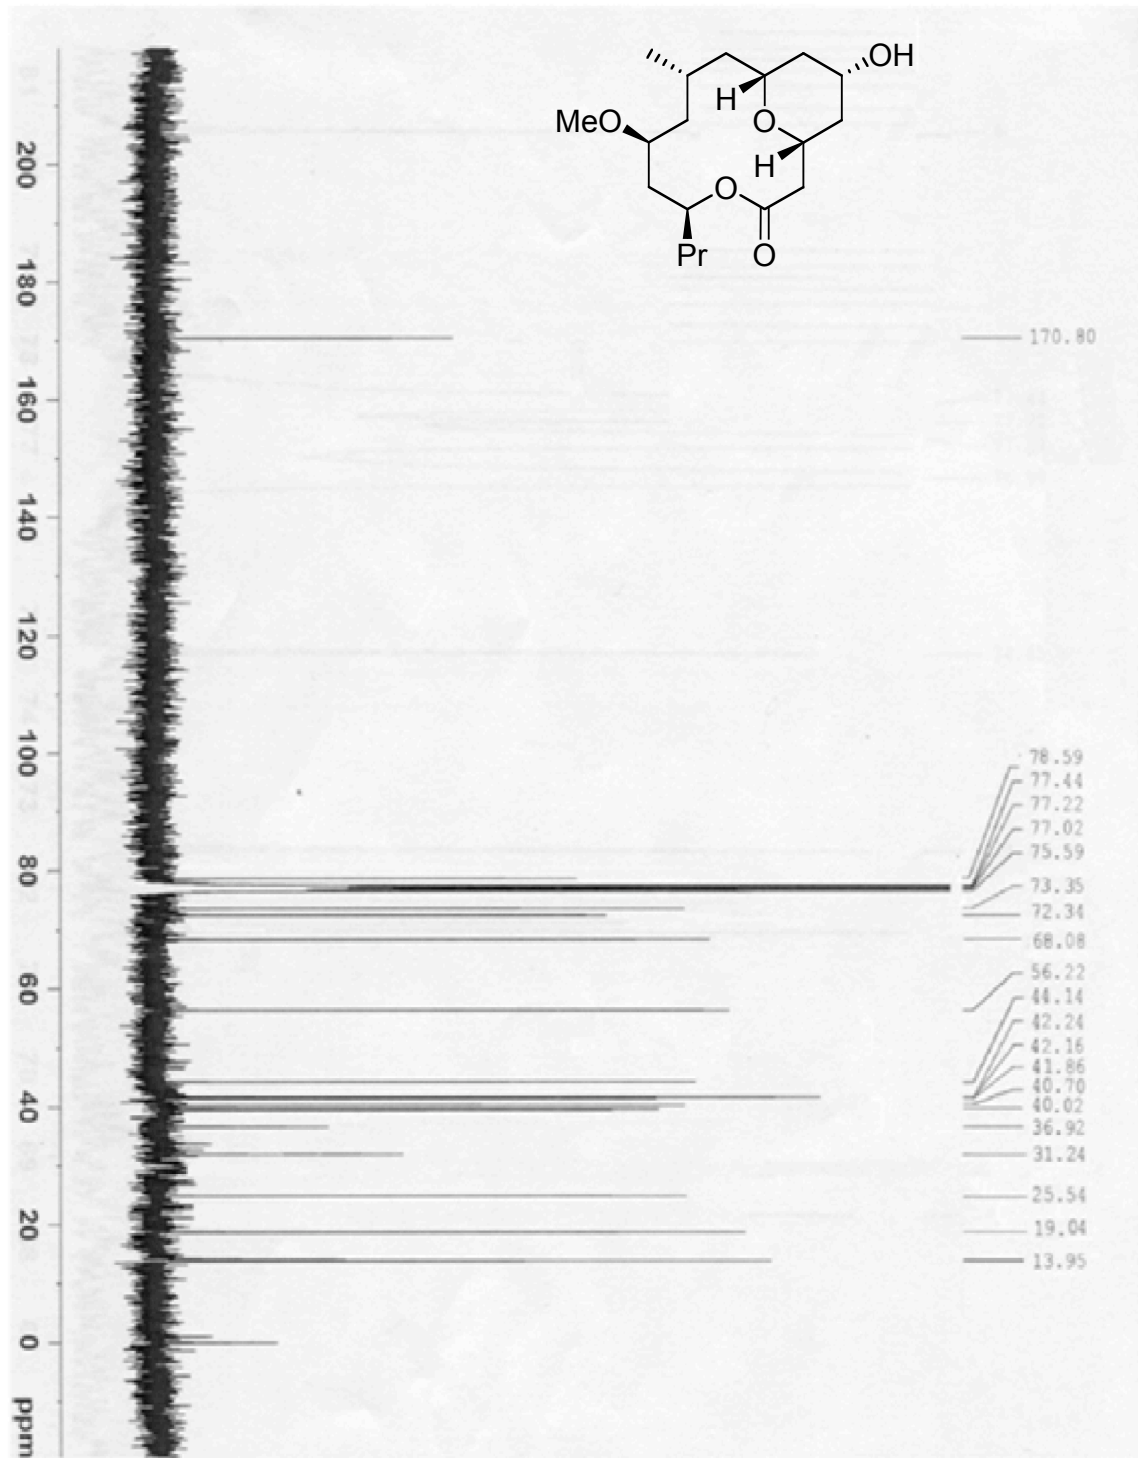

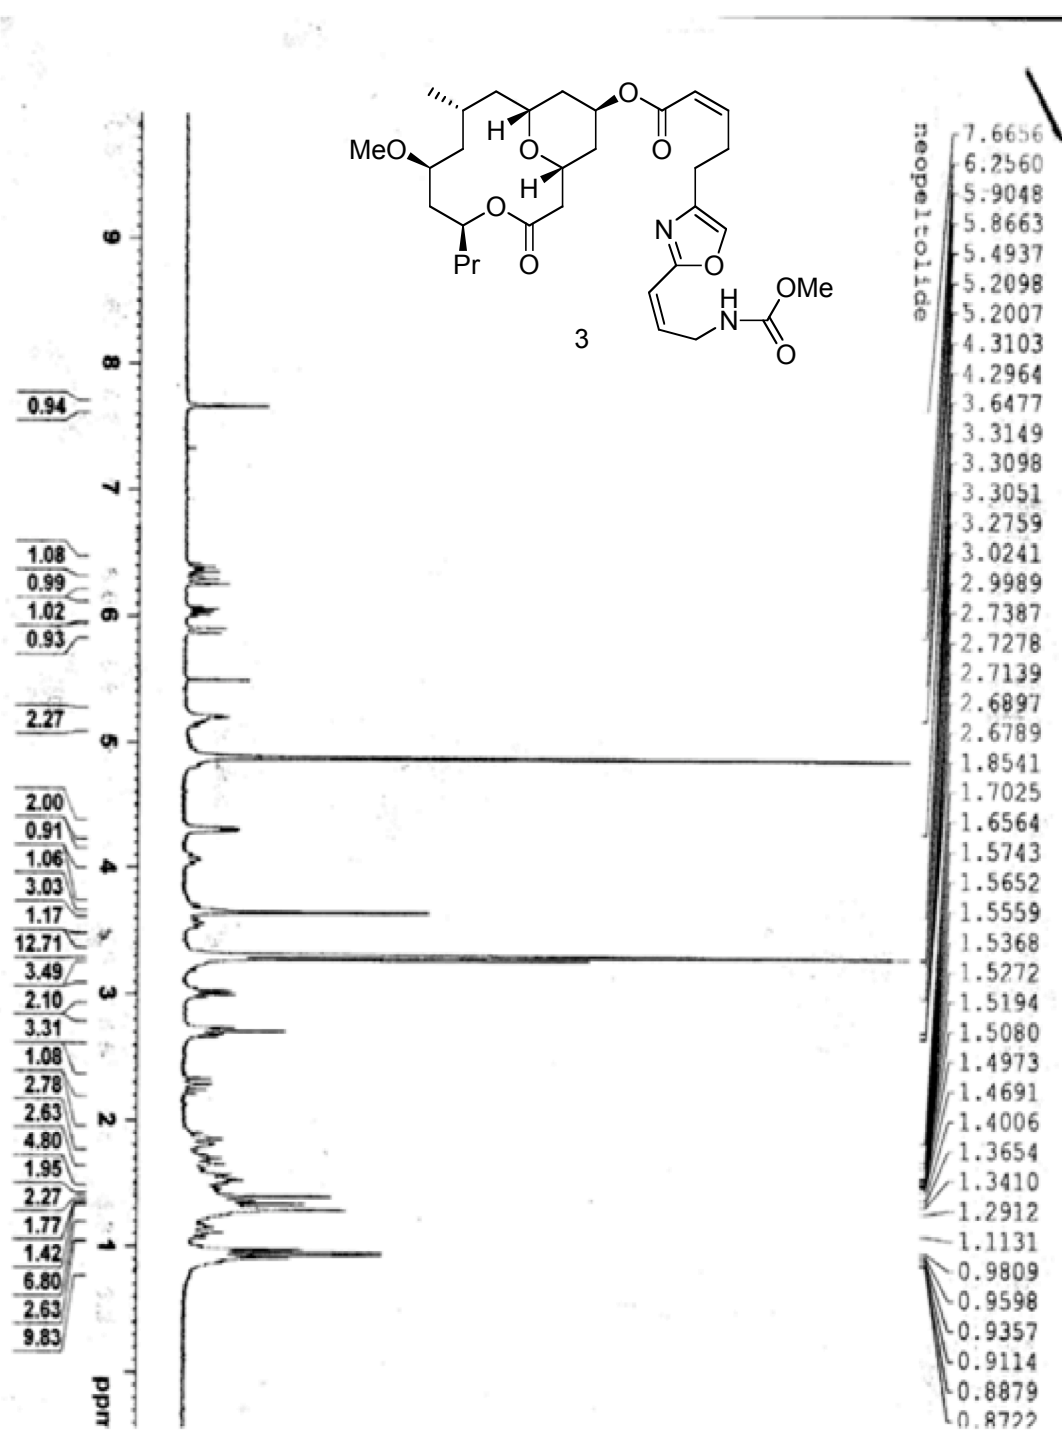

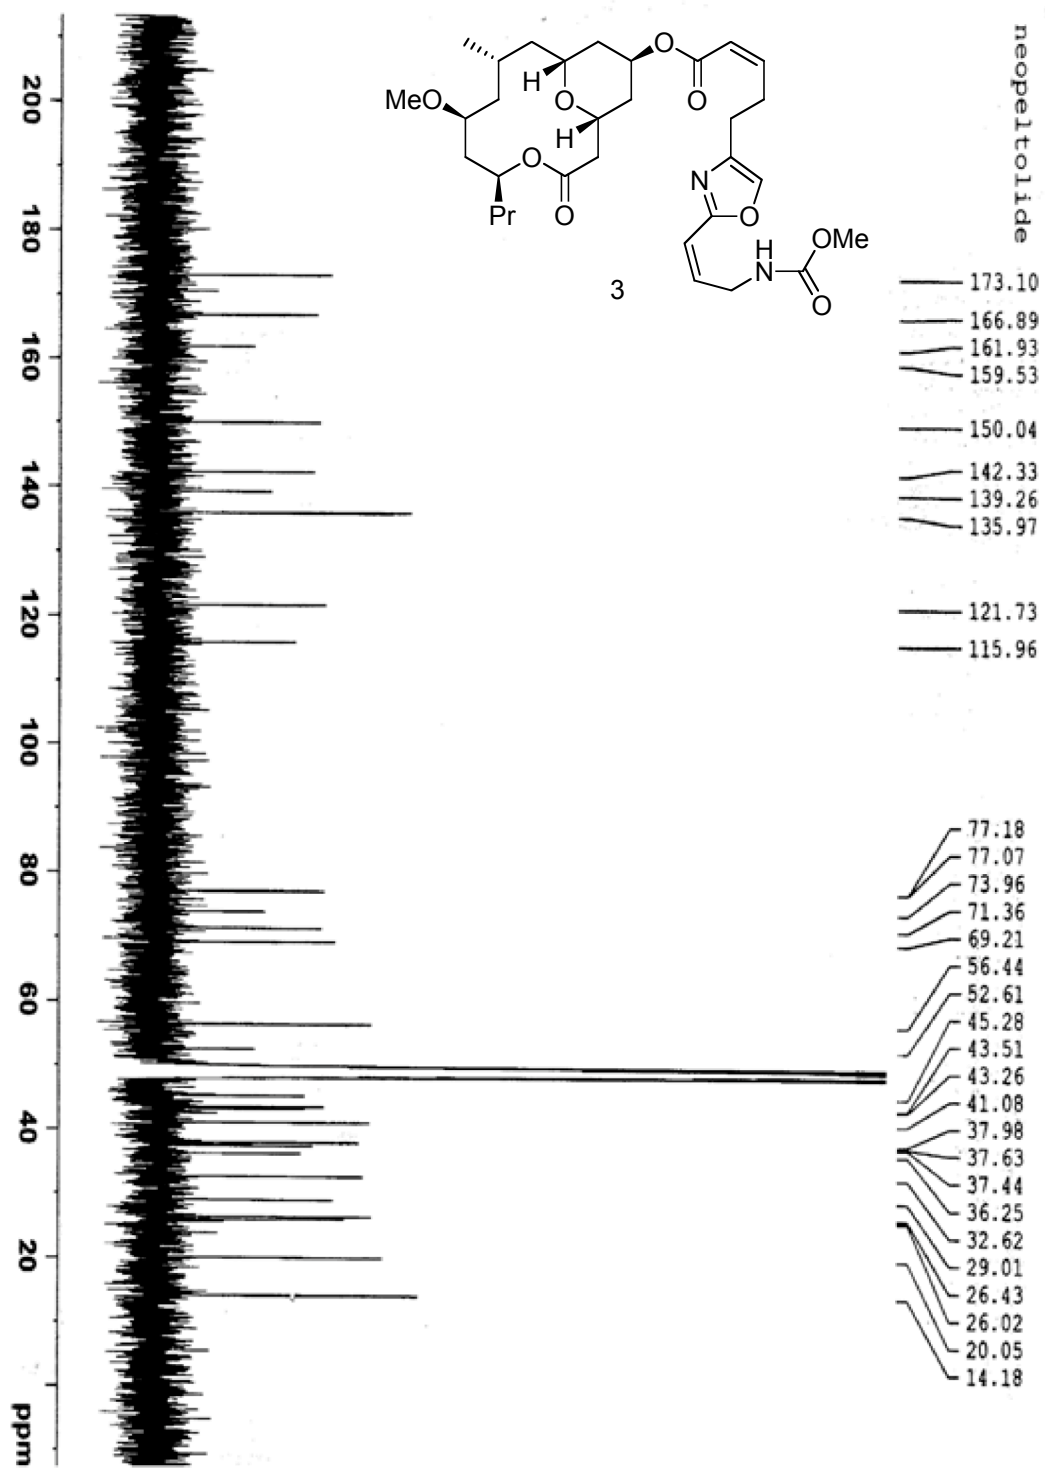

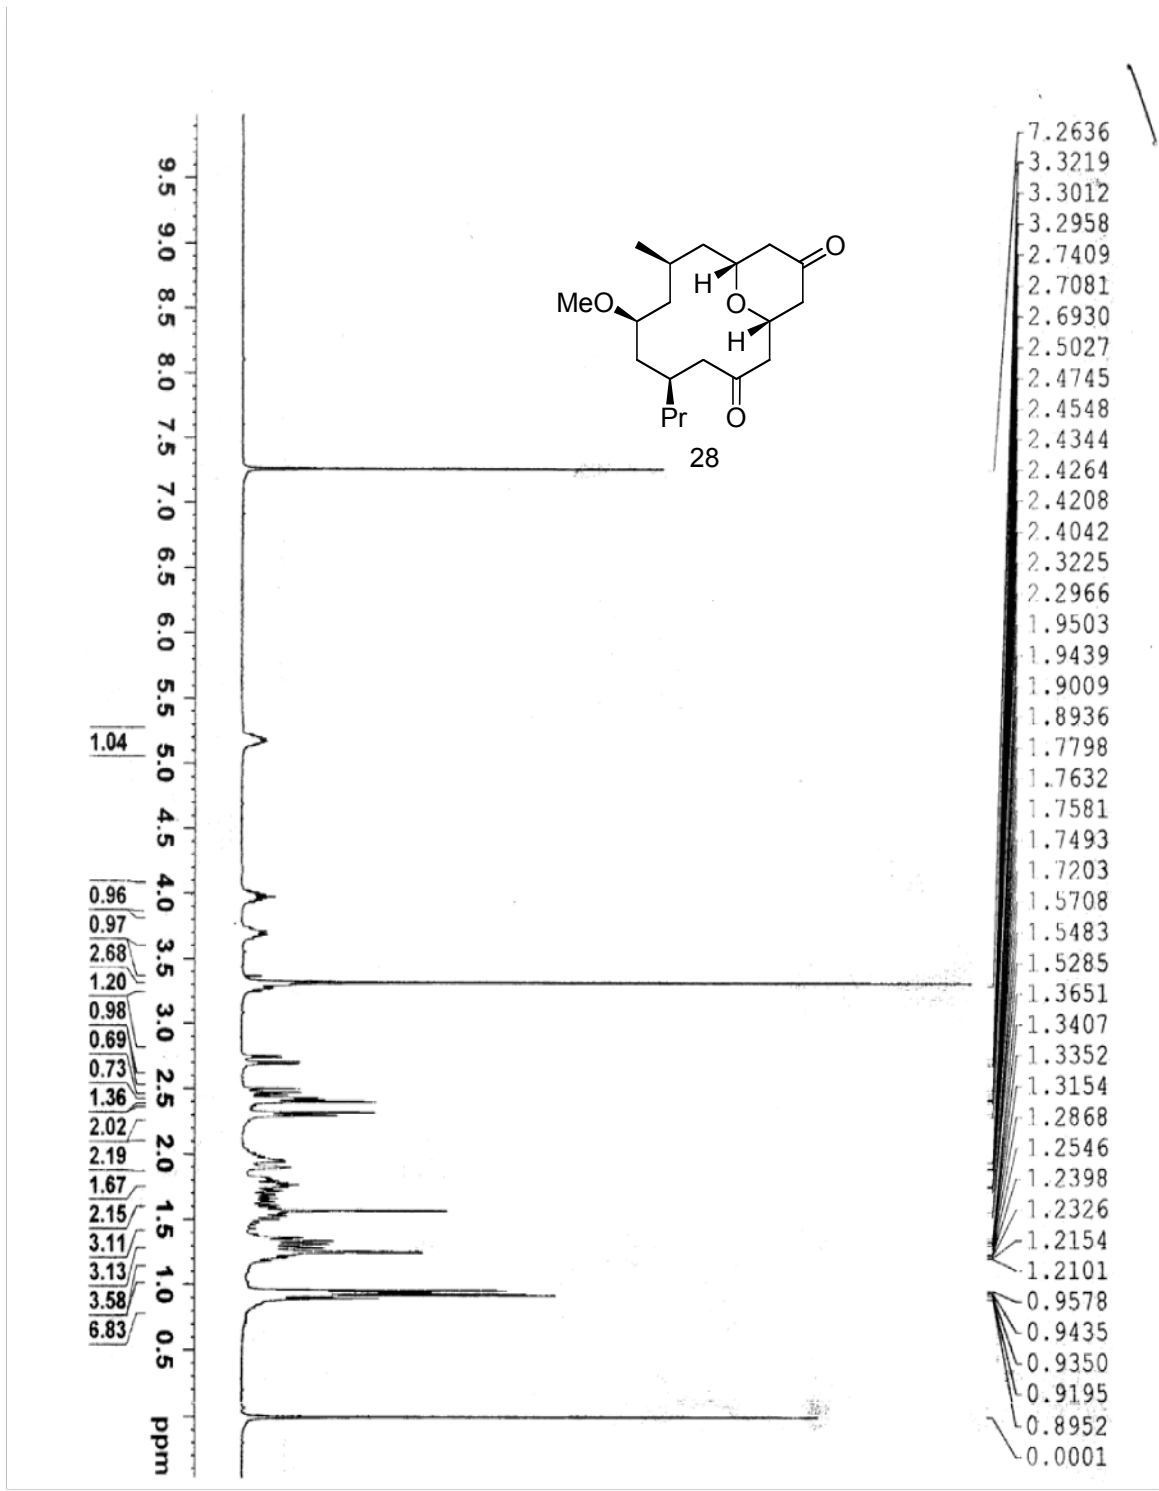

200  
180  
160  
140  
120  
100  
80  
60  
40  
20  
0 ppm

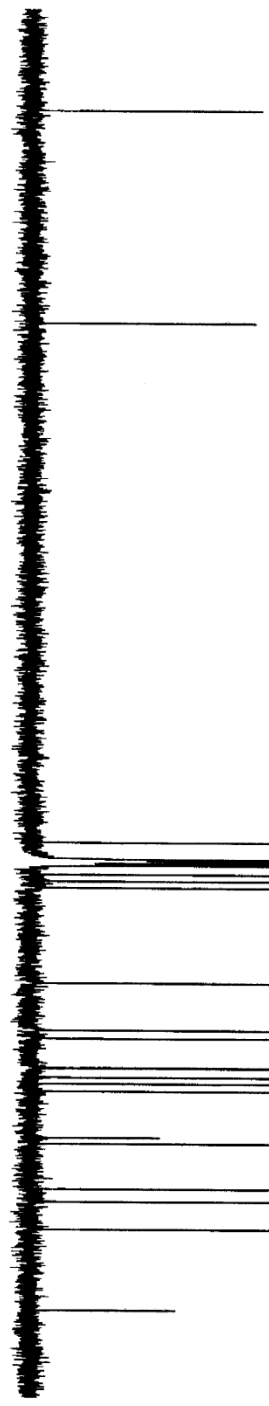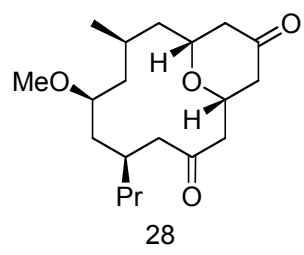

— 206.37

— 169.77

- 80.41
- 77.44
- 77.02
- 76.59
- 74.95
- 73.75
- 72.64
- 56.29
- 48.17
- 46.77
- 41.73
- 41.64
- 40.07
- 39.00
- 37.68
- 28.63
- 20.88
- 18.71
- 13.93
- 0.00

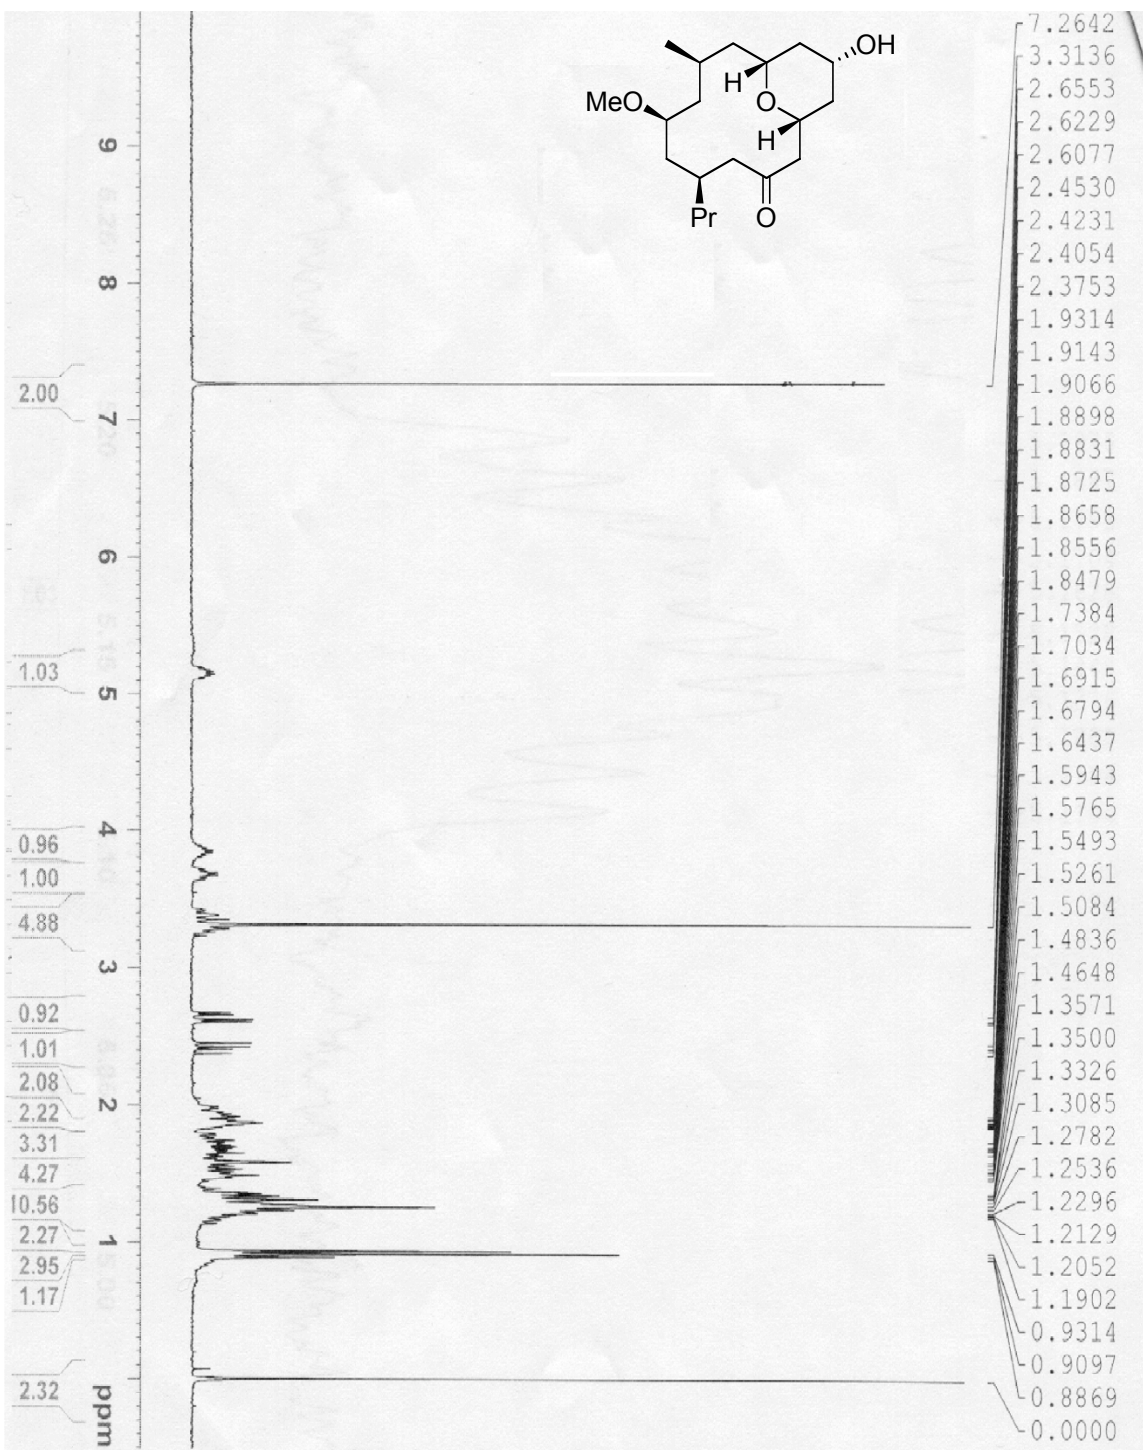



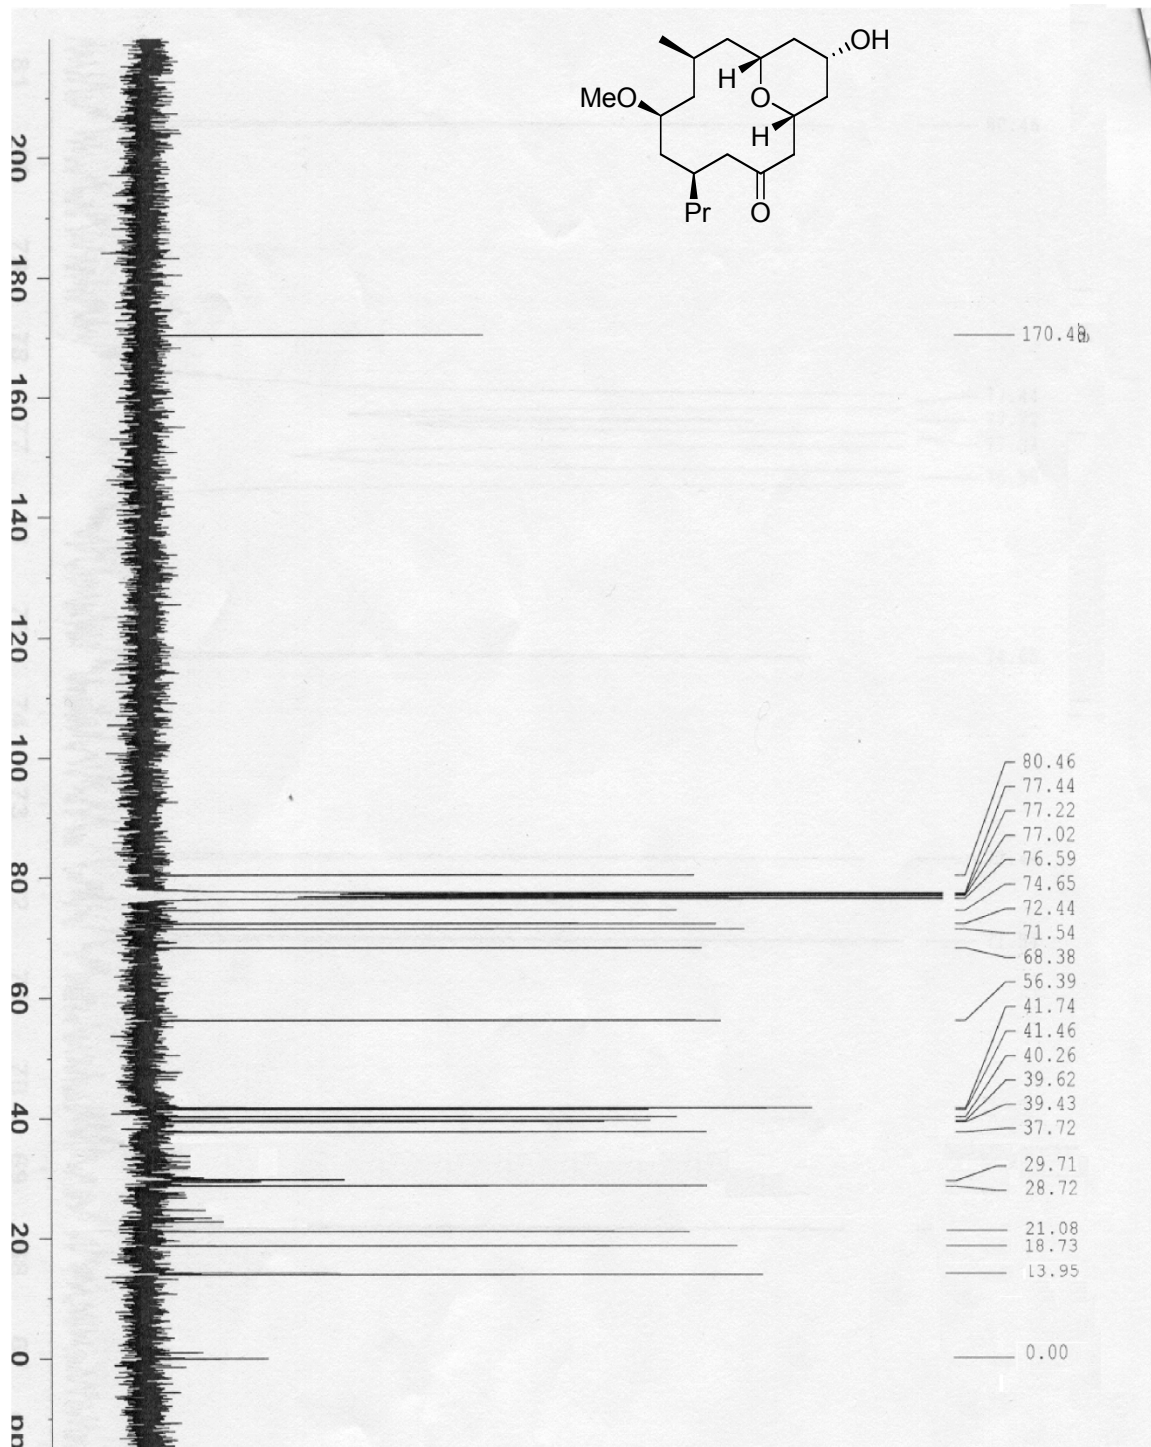

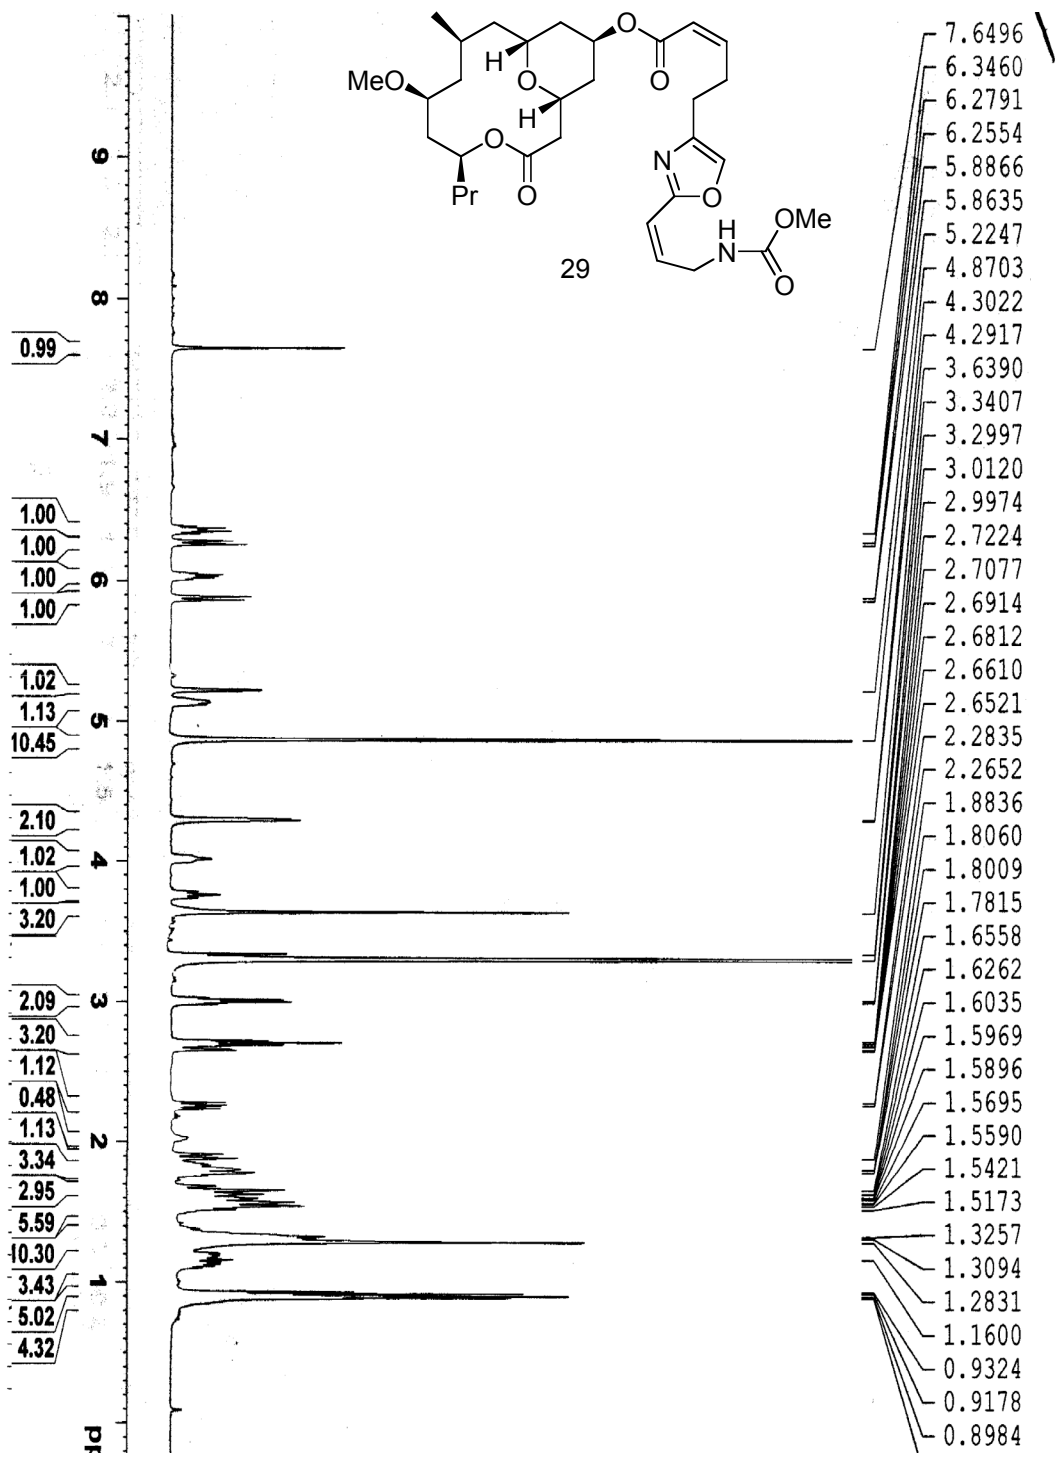

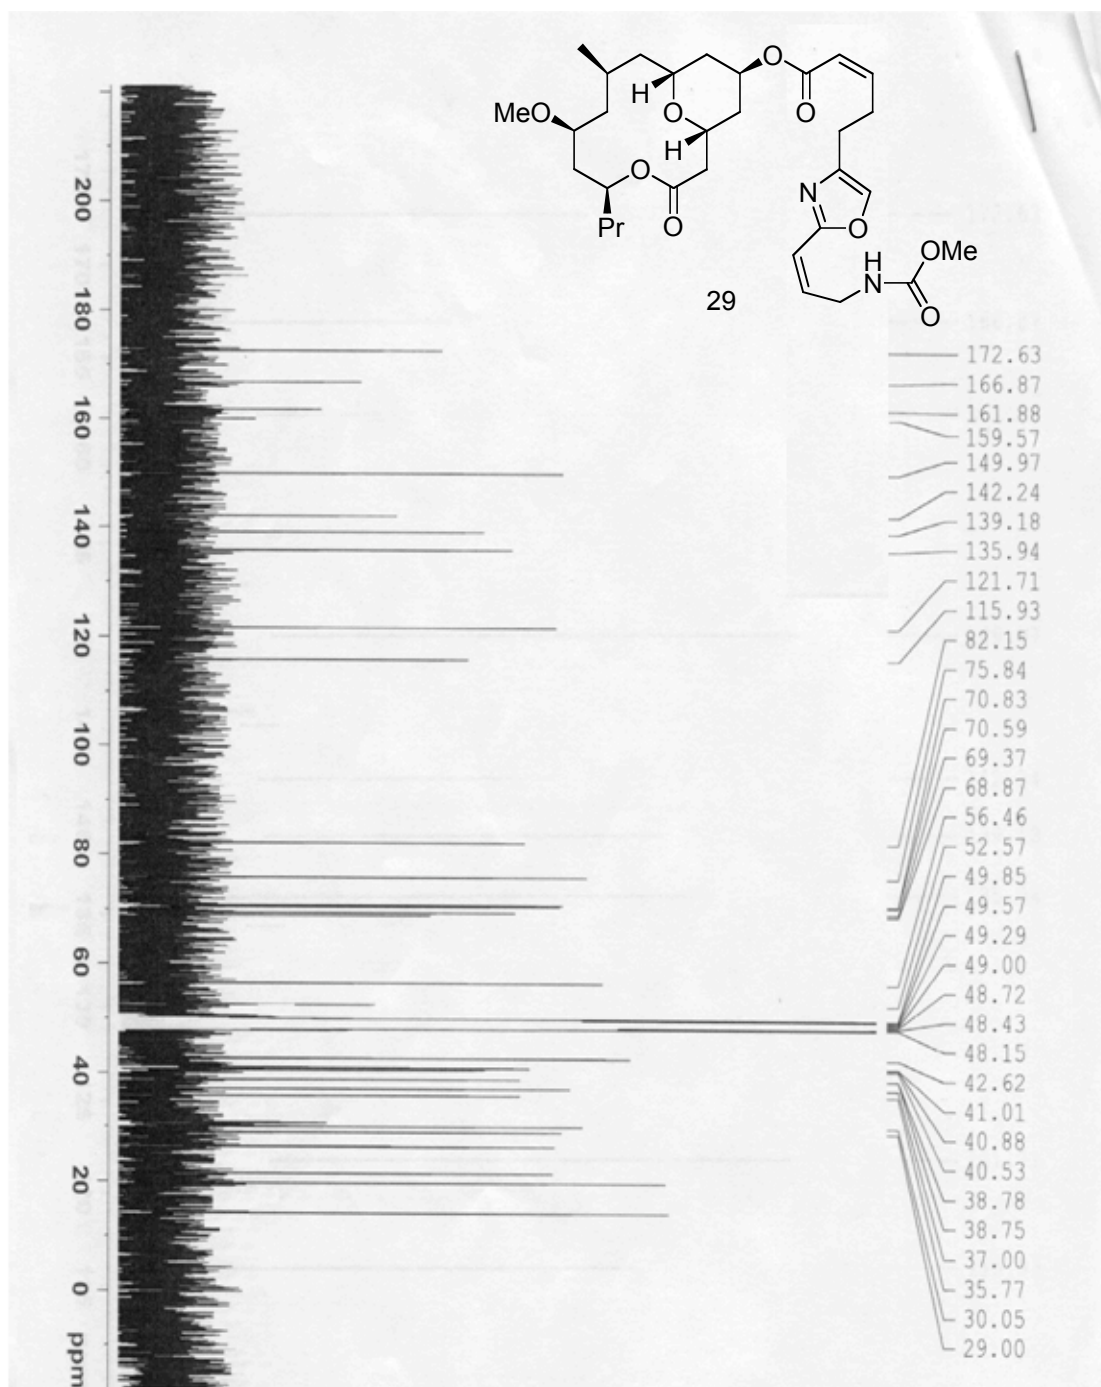

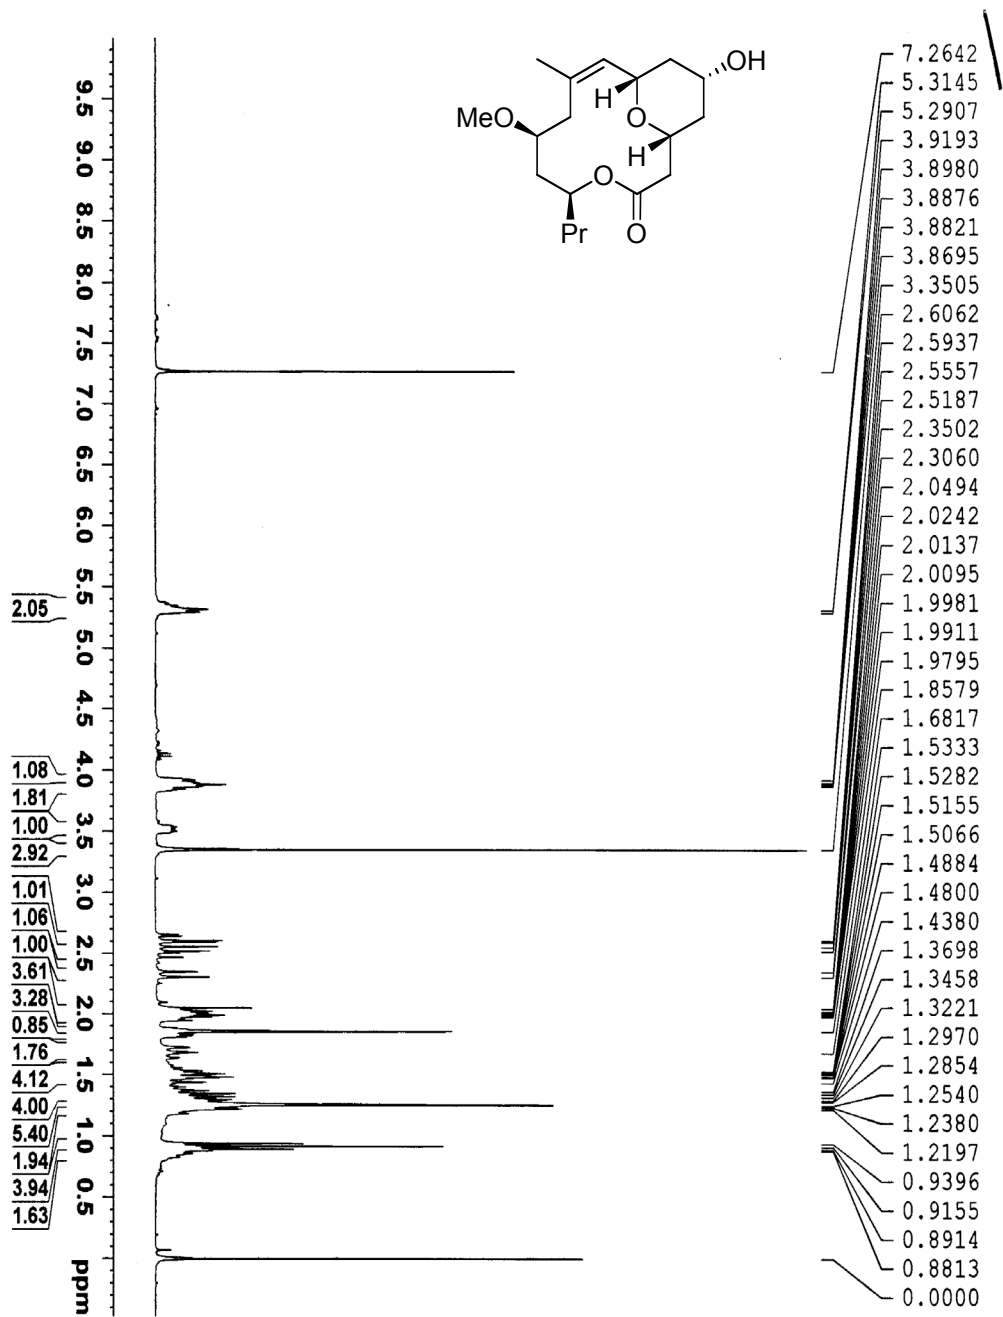

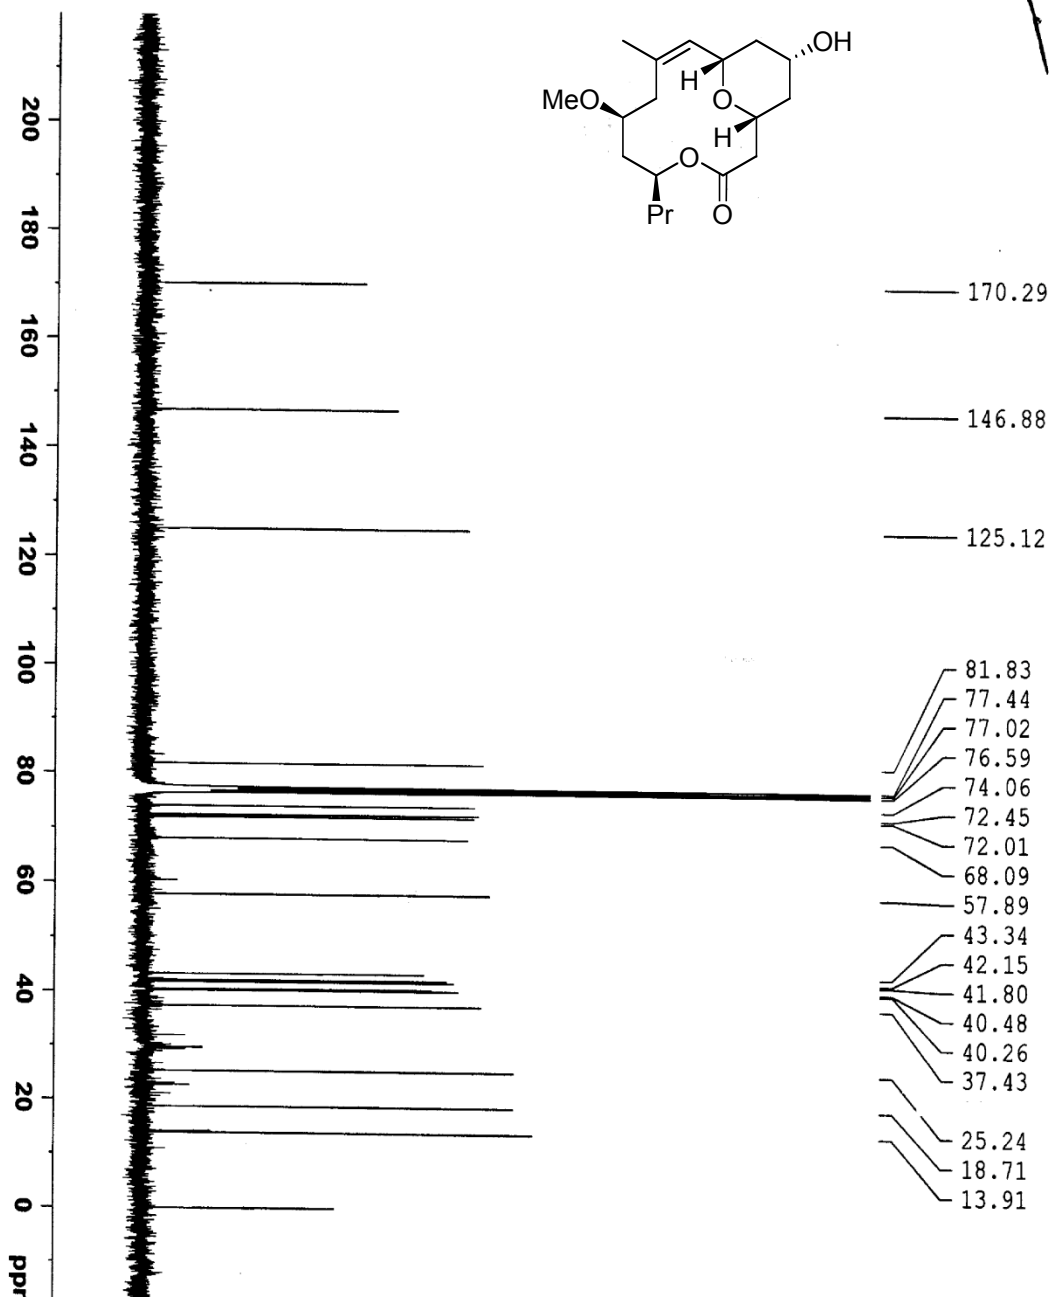

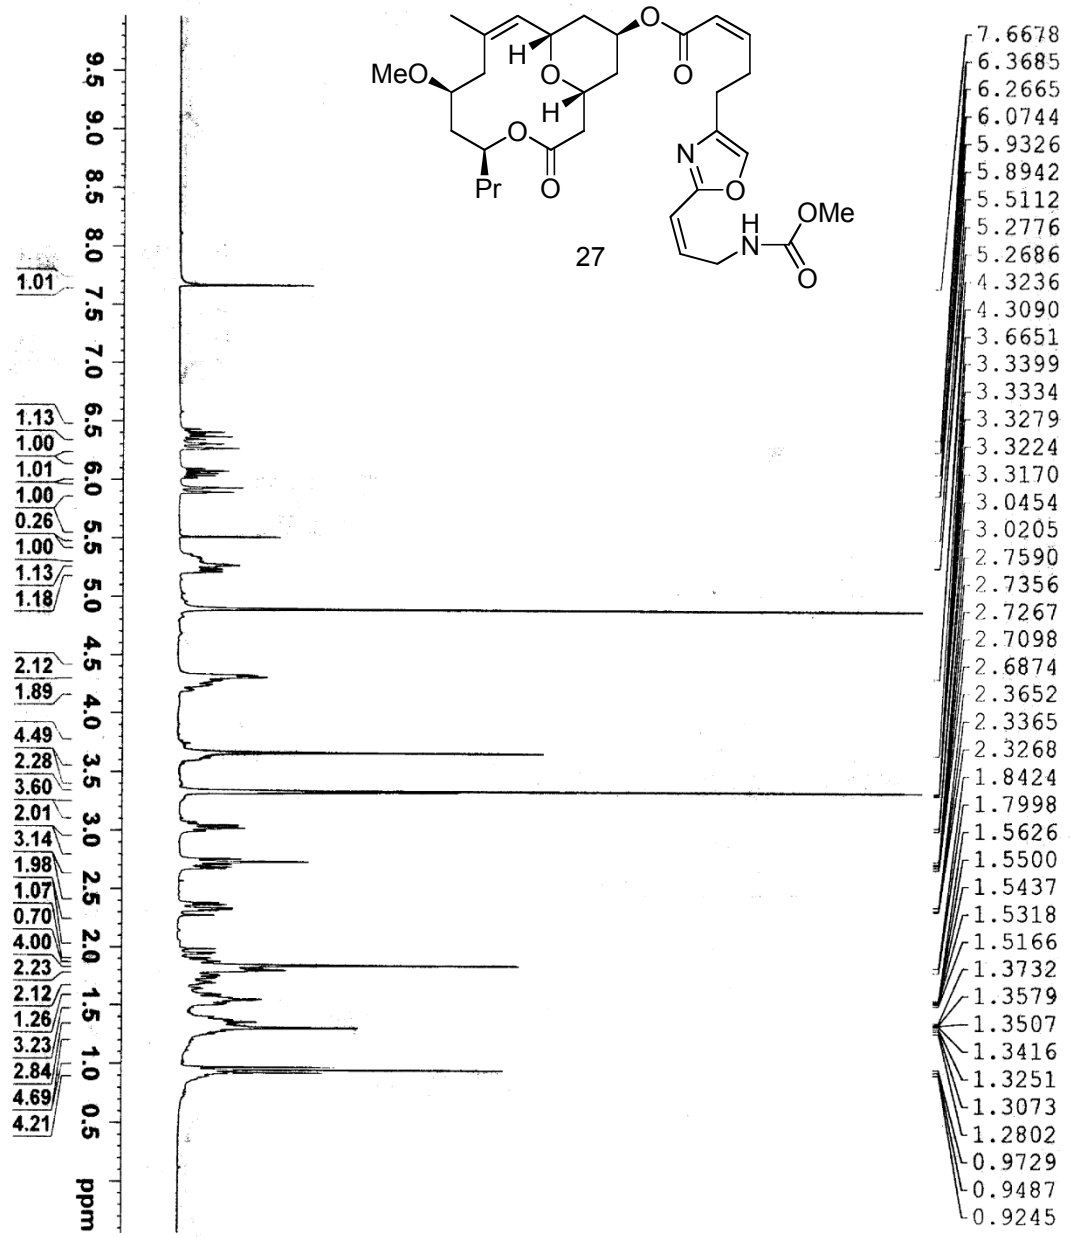

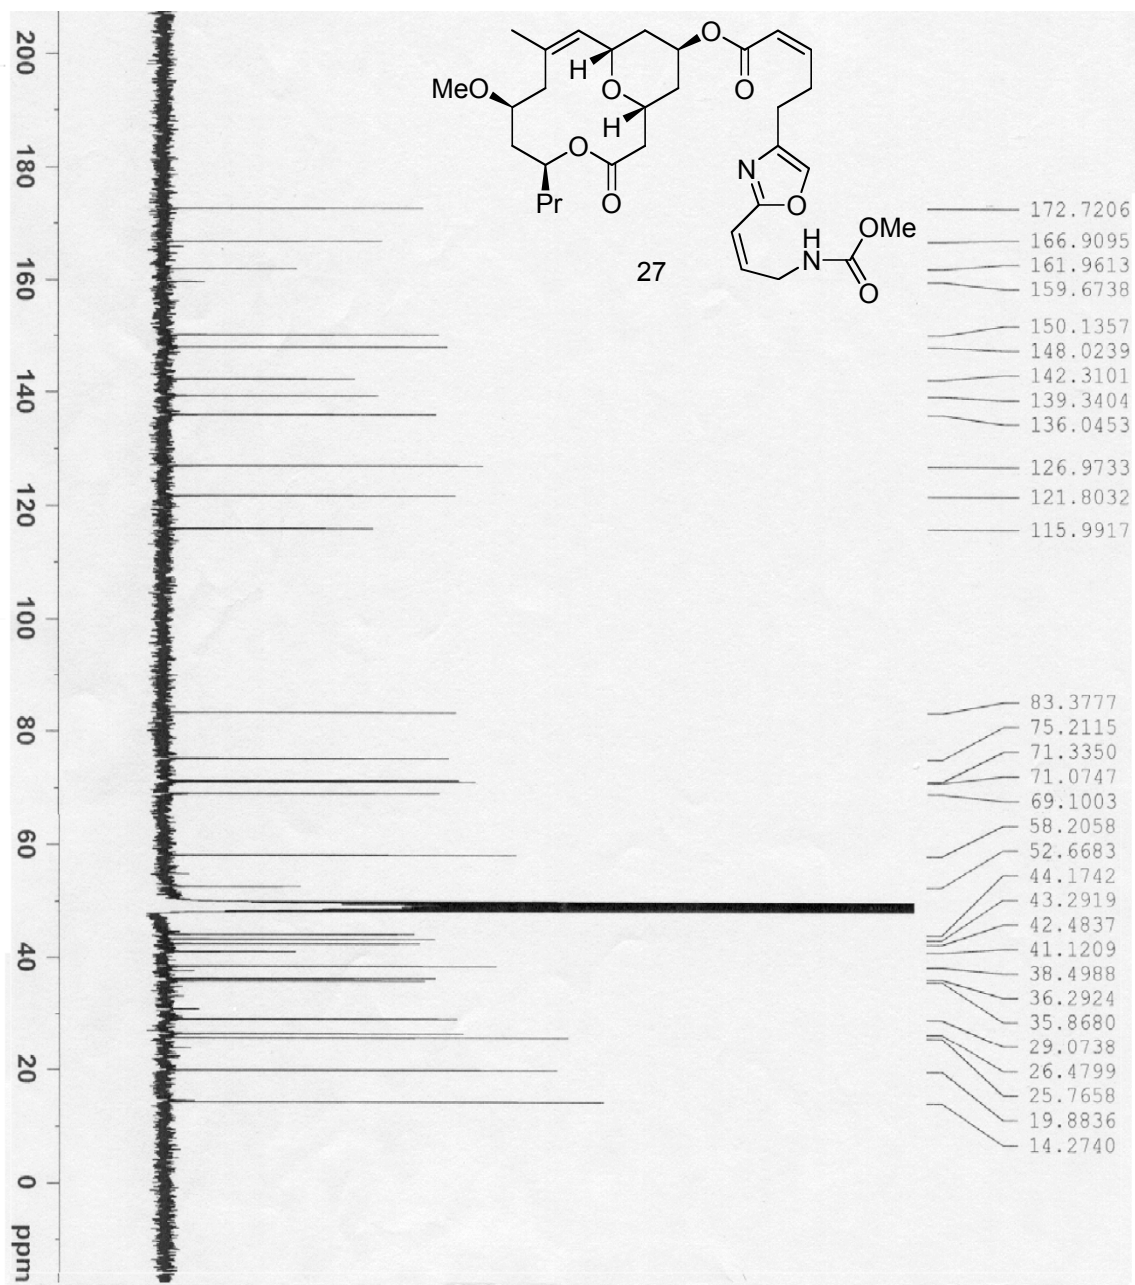

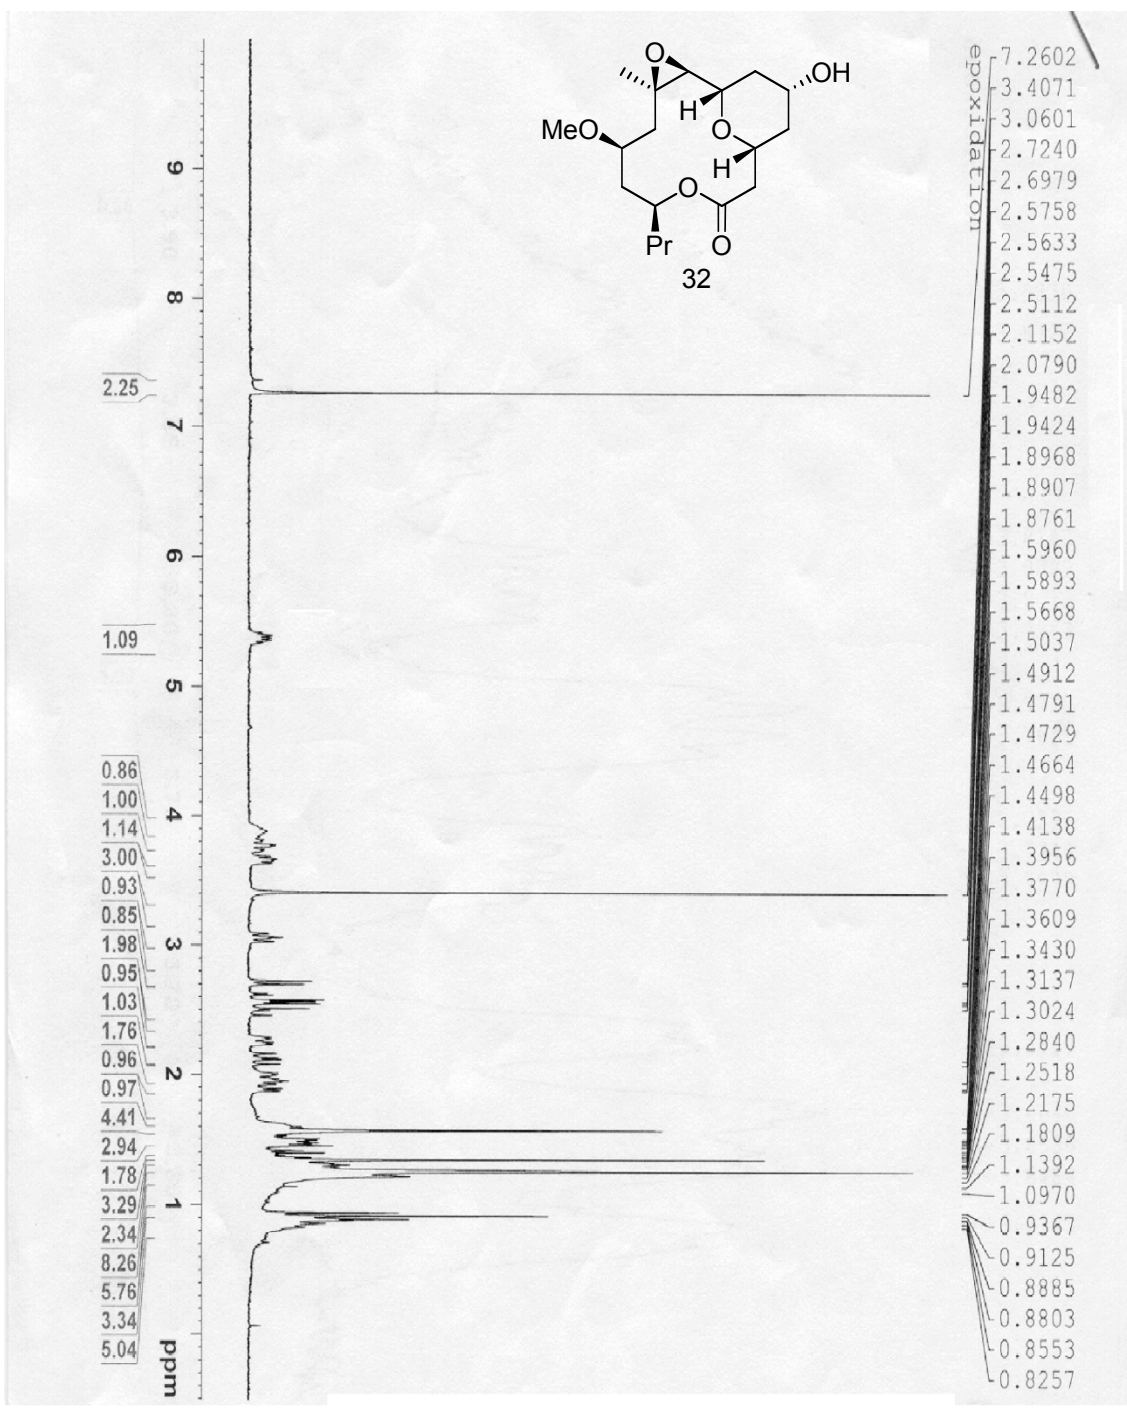



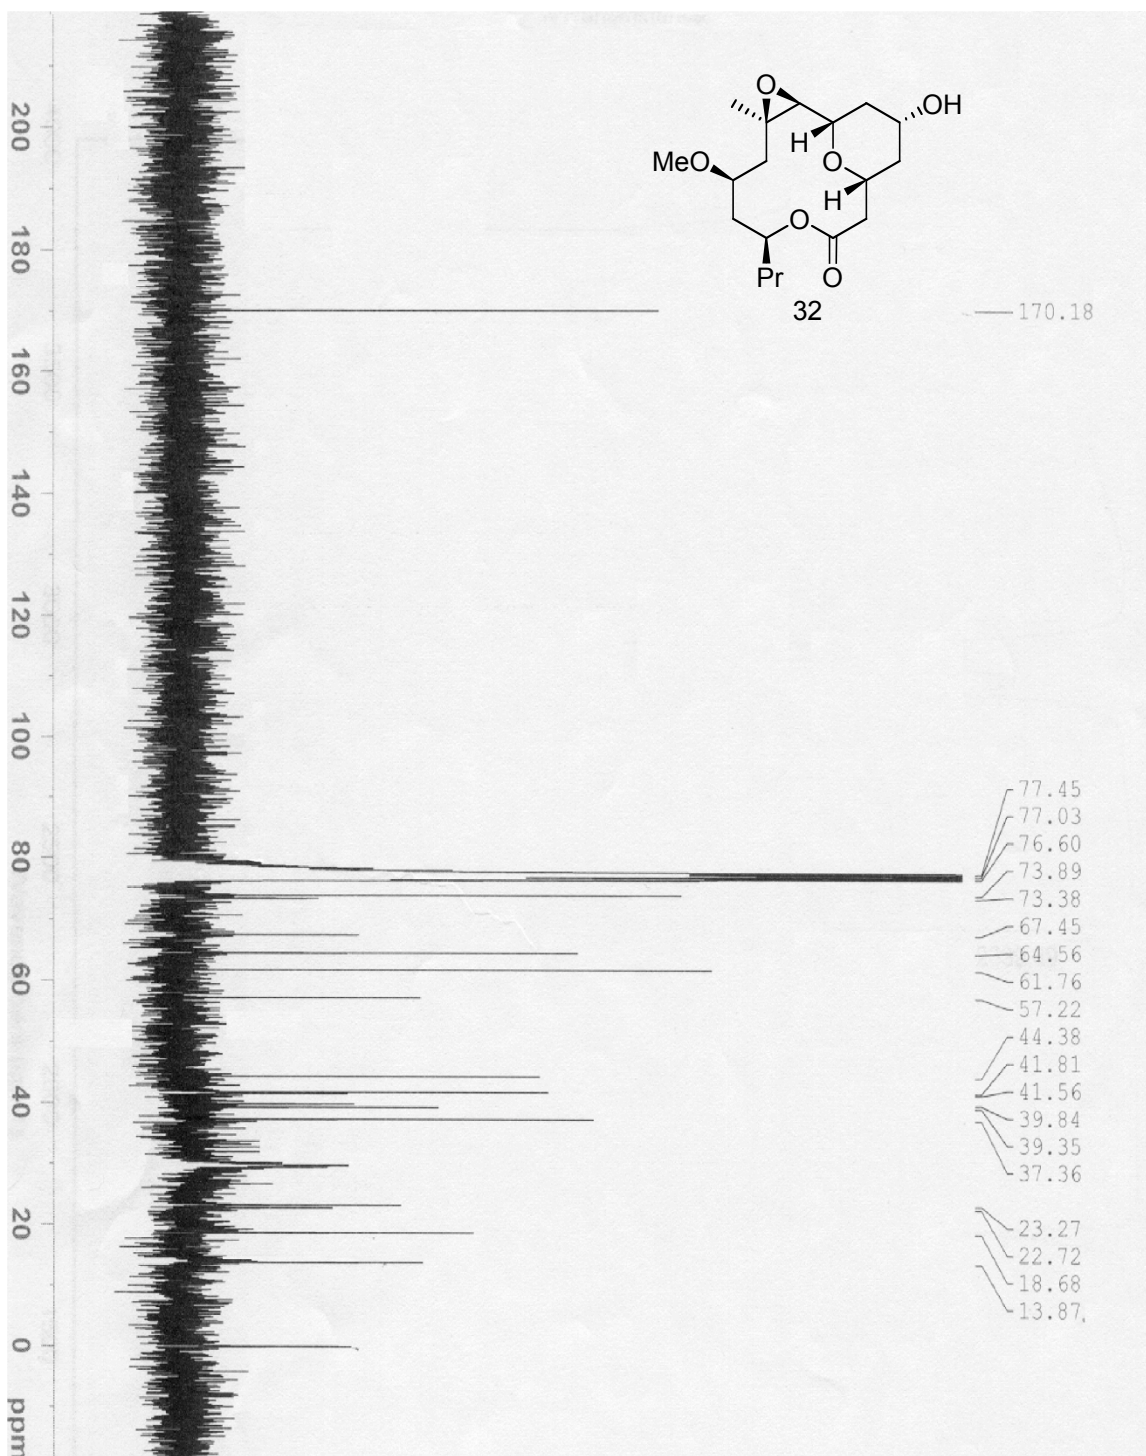

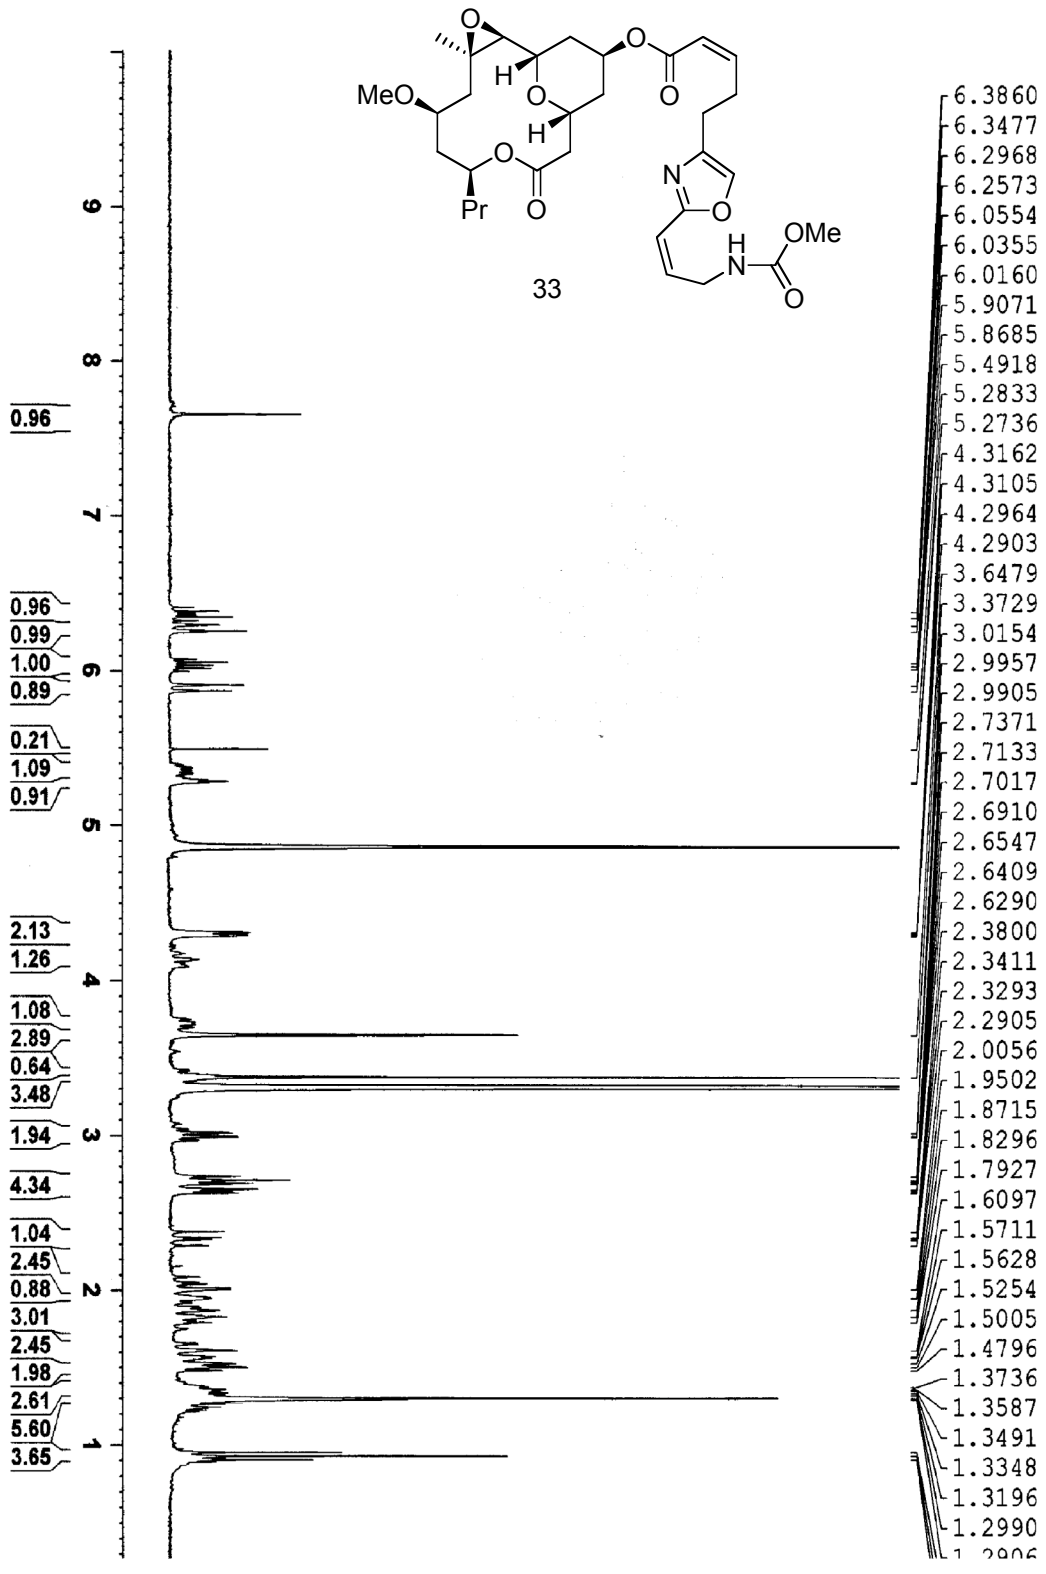

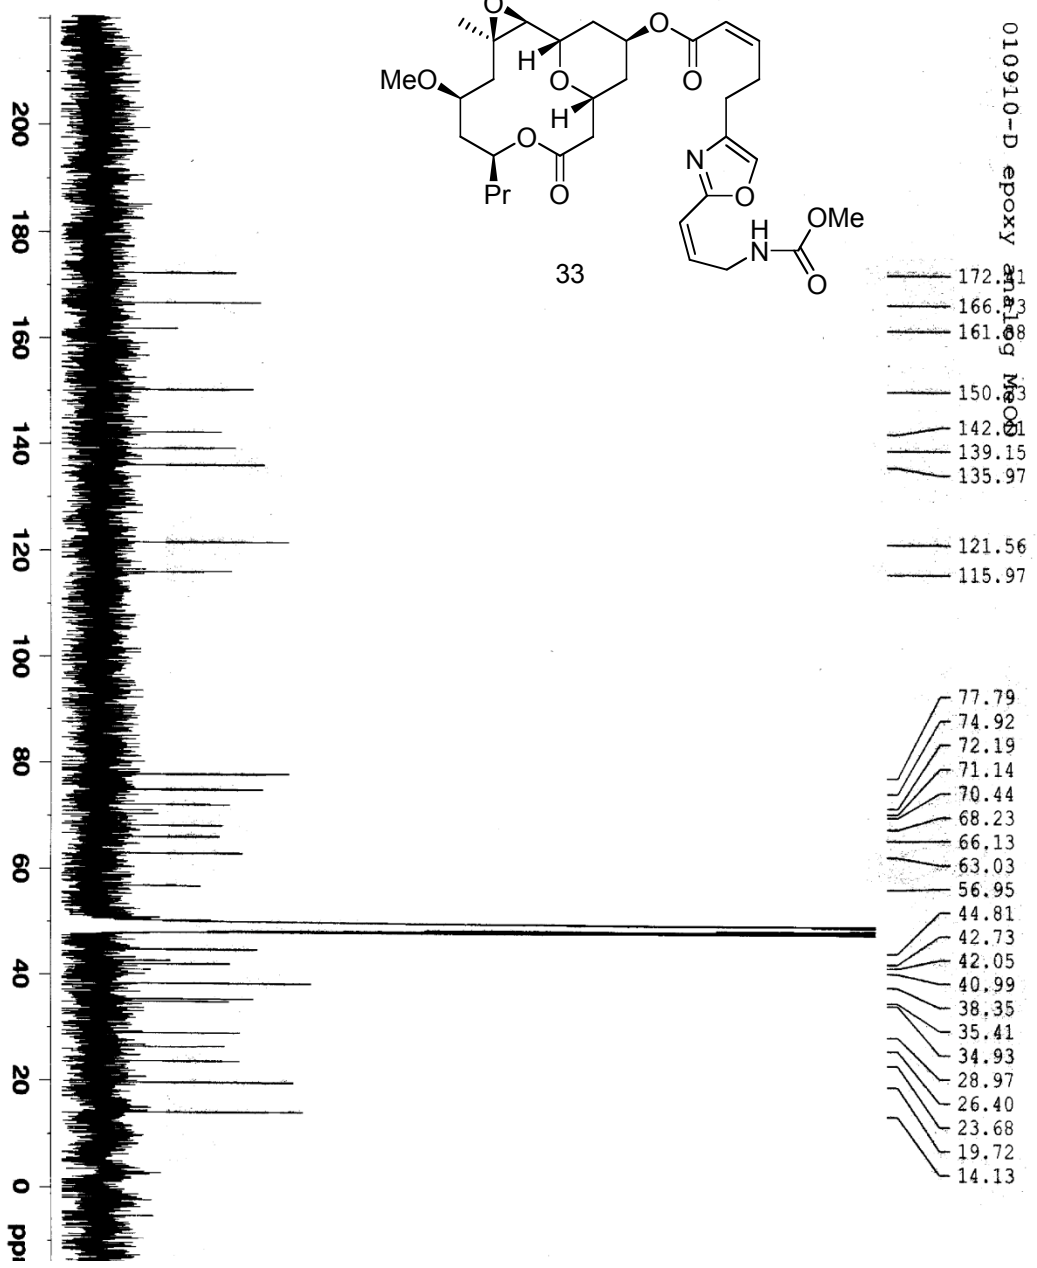

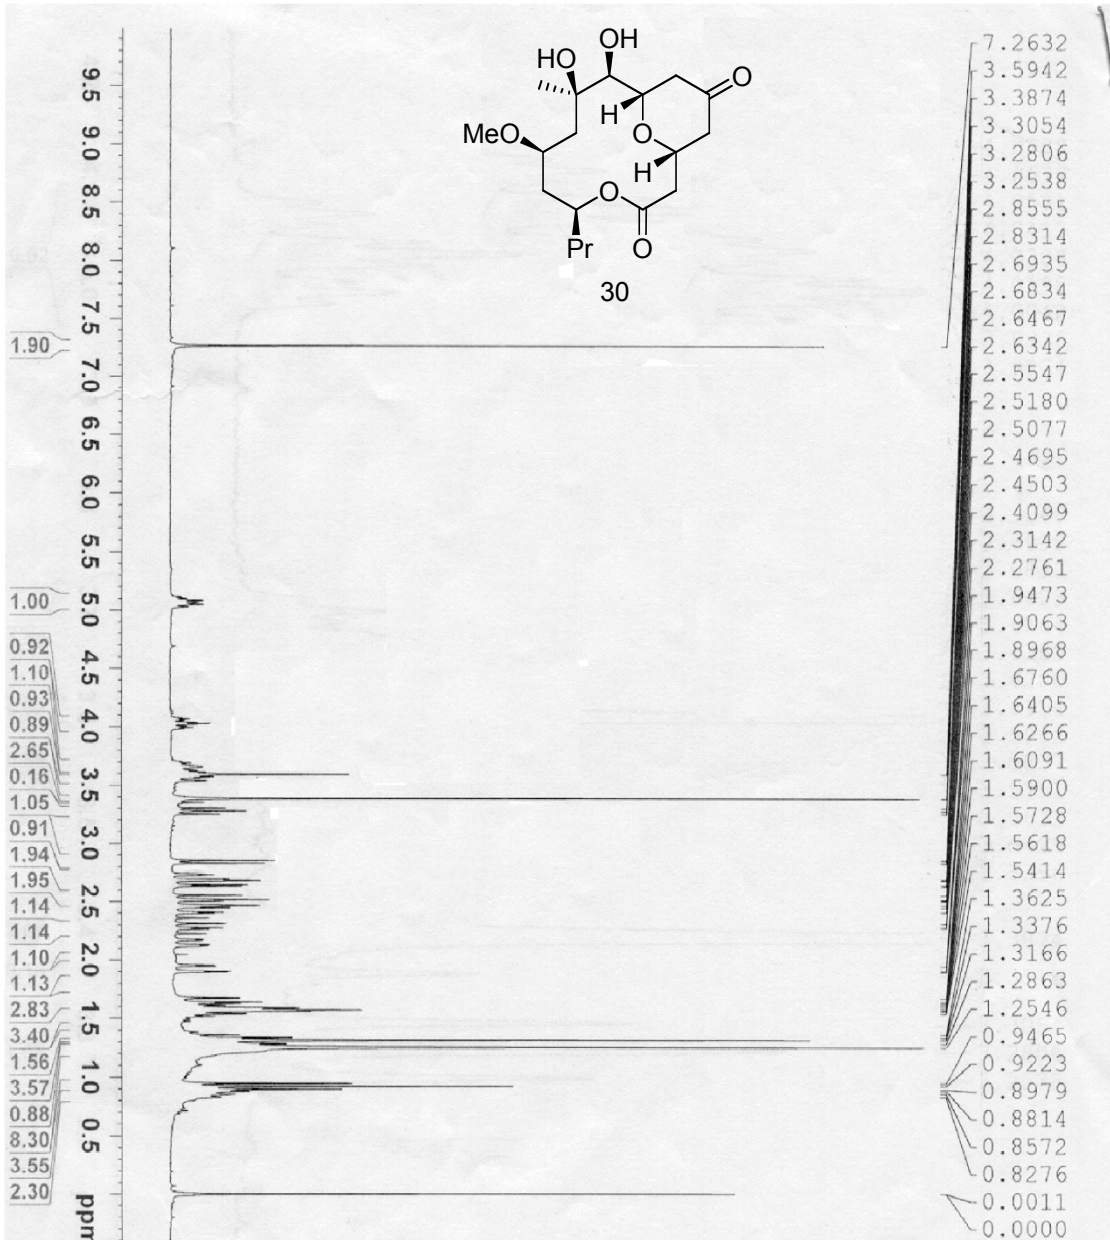

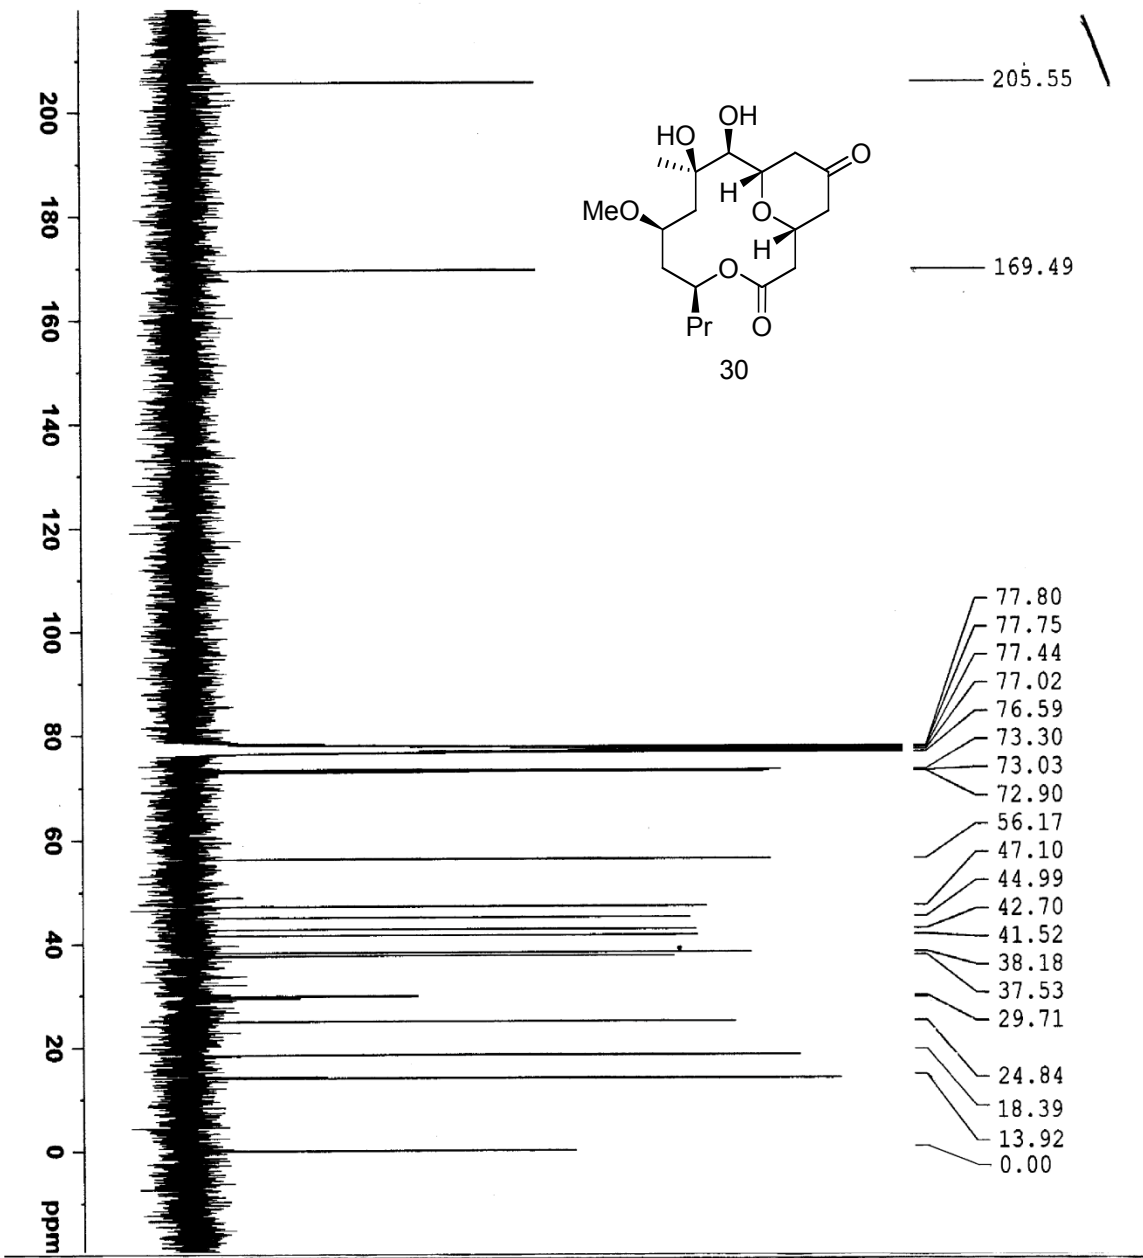

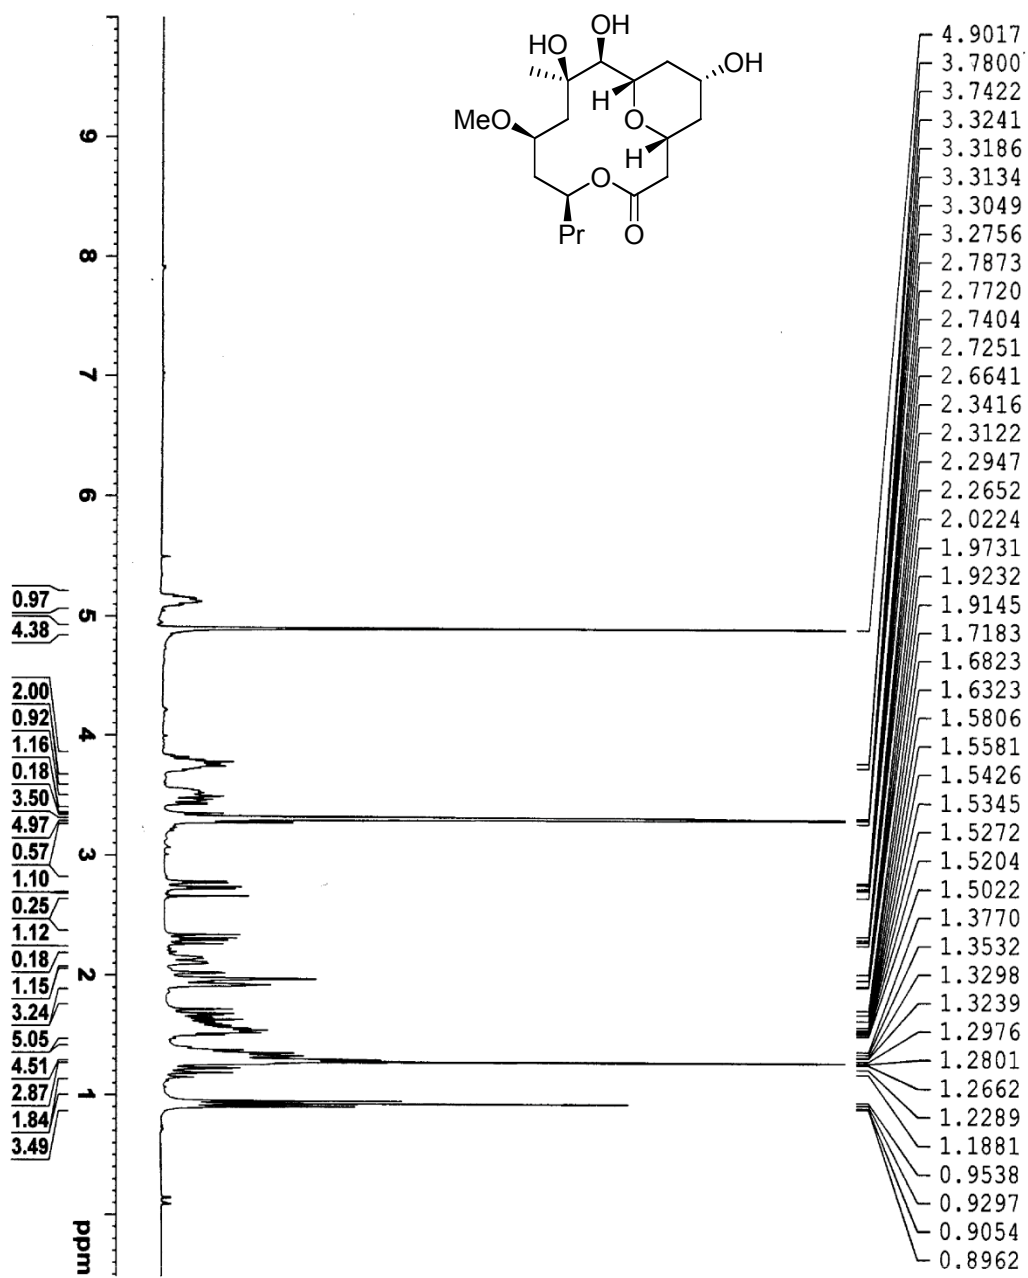

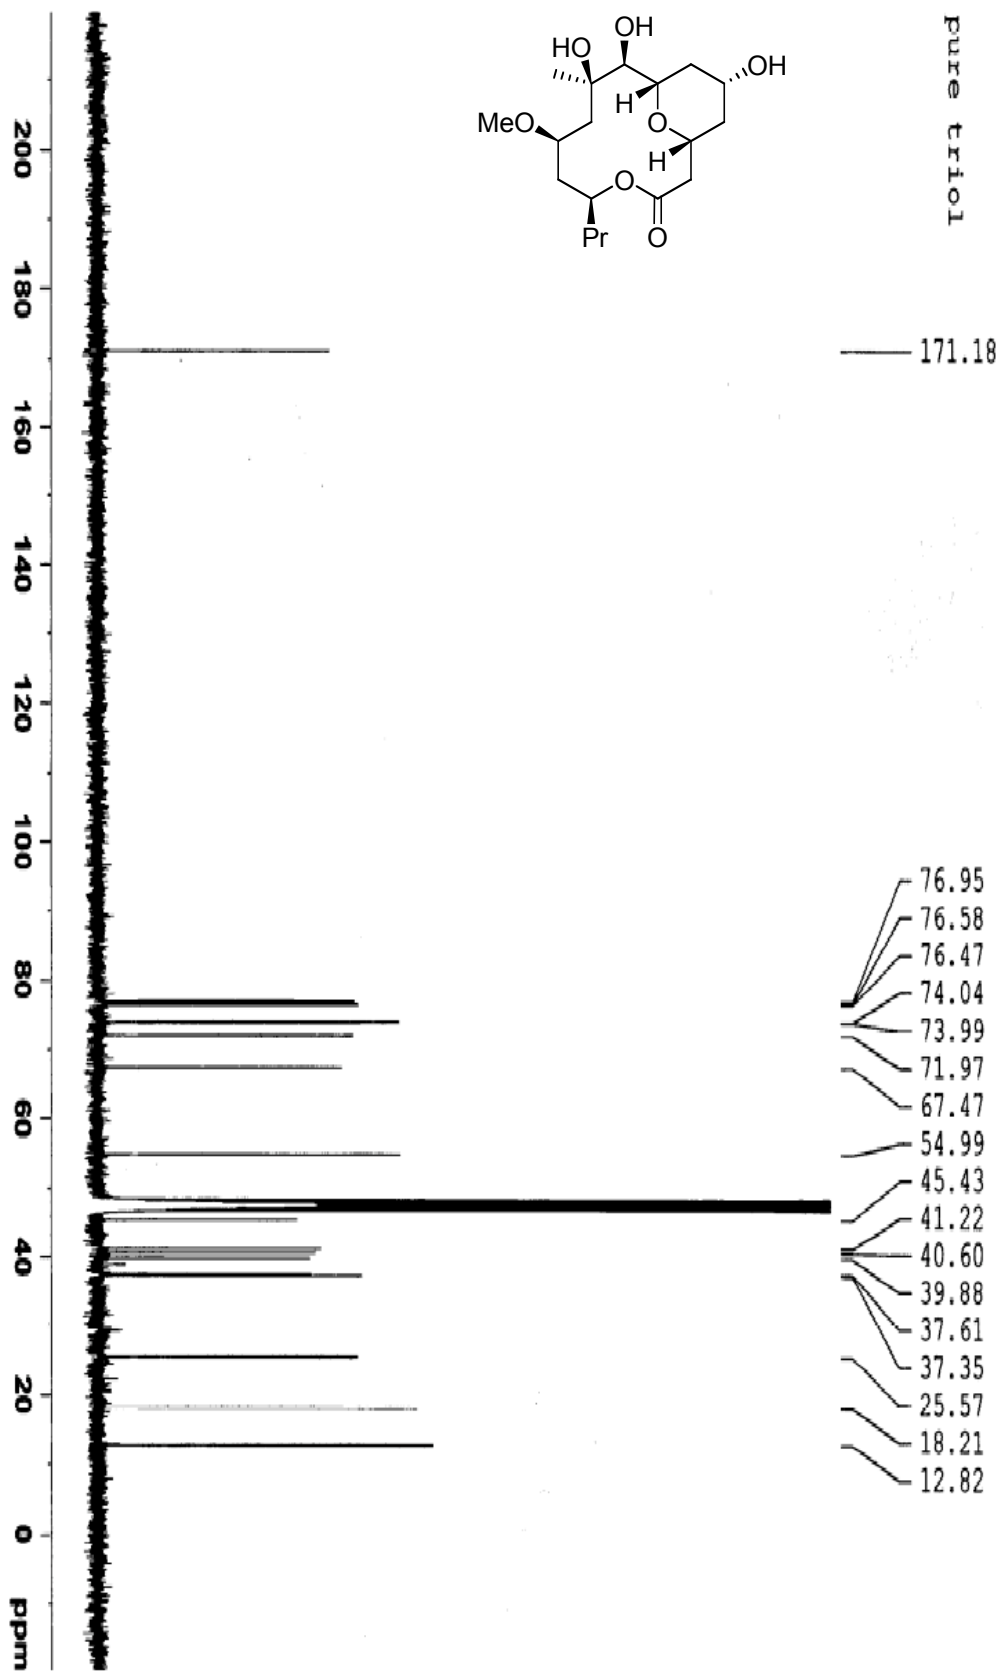

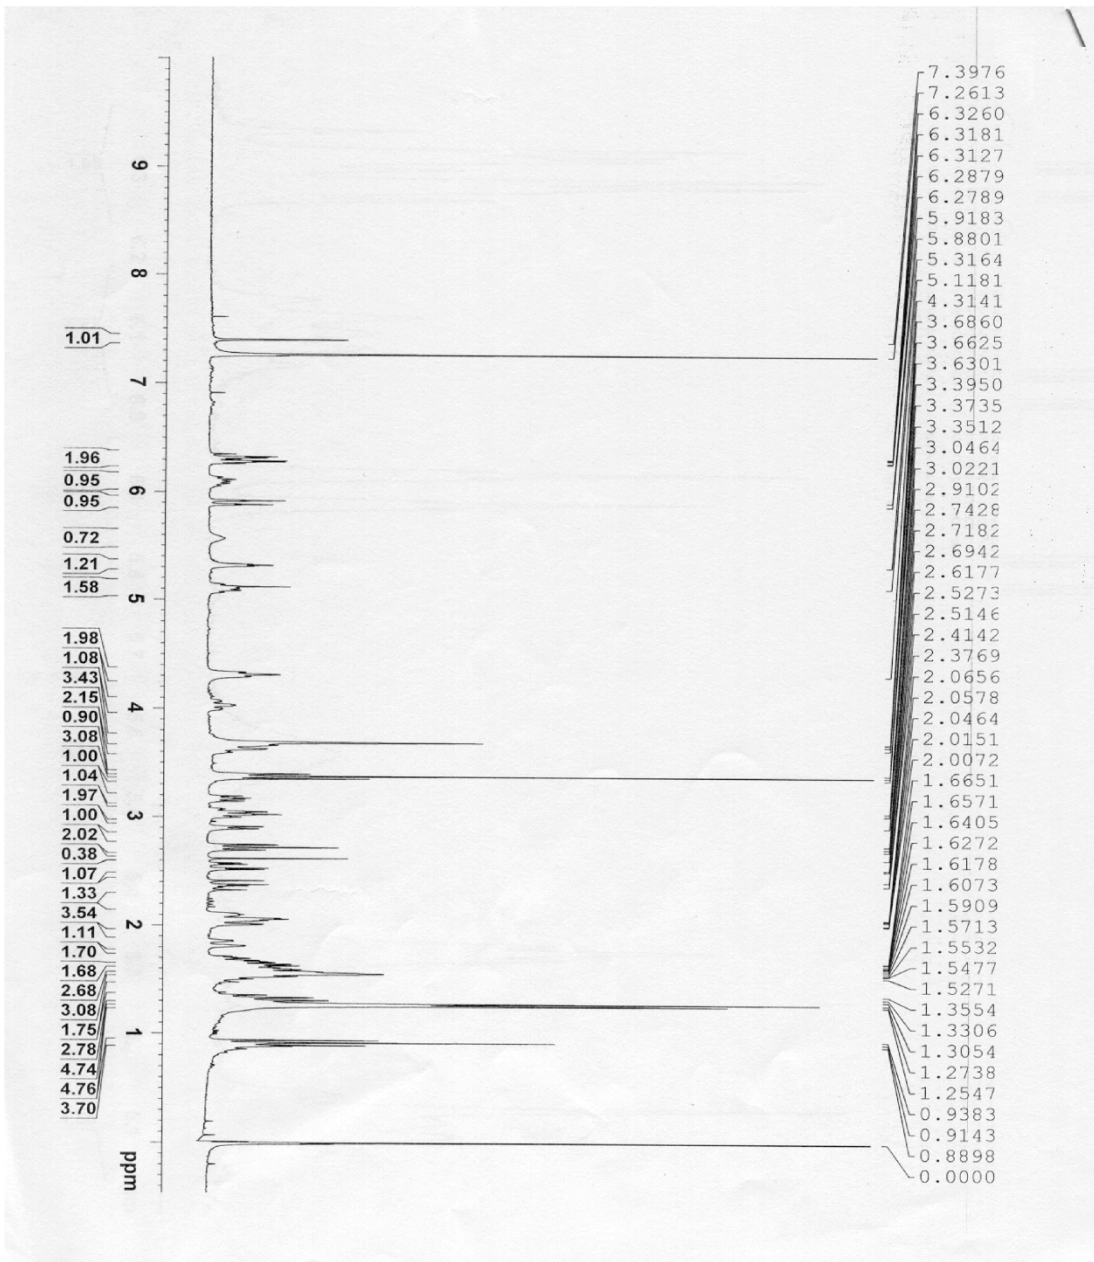



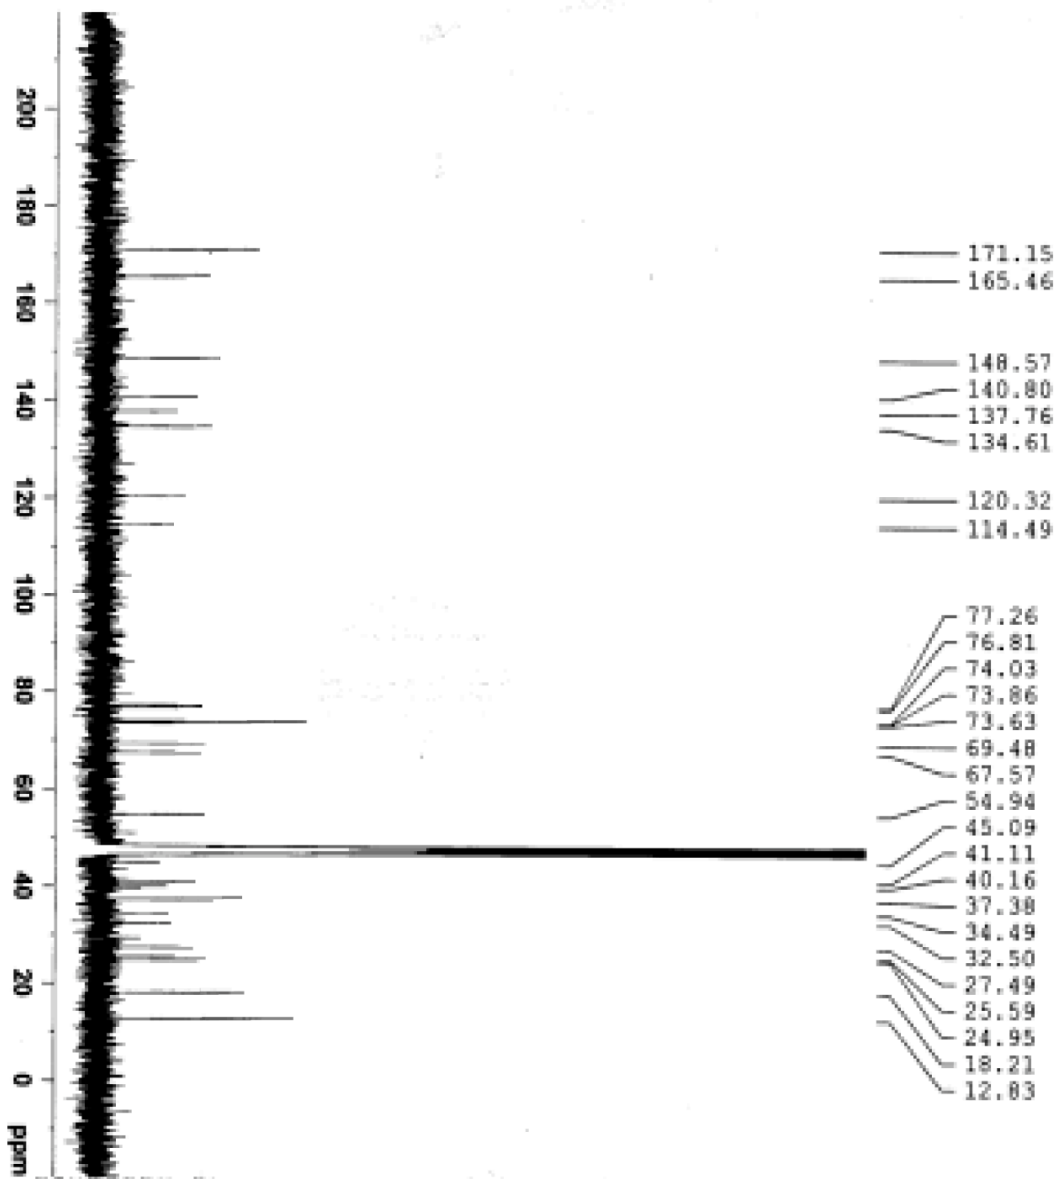

Supplement: NIHMS193388-supplement-01.pdf [file NIHMS193388-supplement-01.pdf]
